# Supplementary material
Source: Copernicus journal article supplement (doi:10.5194/os-22-2101-2026)
Supplement: Supplementary file 1 [file os-22-2101-2026-supplement.pdf]

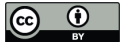

*Supplement of*

## **A T-DINEOF model for multiple oceanic variables reconstruction**

**Bo Ping et al.**

*Correspondence to:* Bo Ping (pingbo@tju.edu.cn) and Cunjin Xue (xuecj@radi.ac.cn)

The copyright of individual parts of the supplement might differ from the article licence.

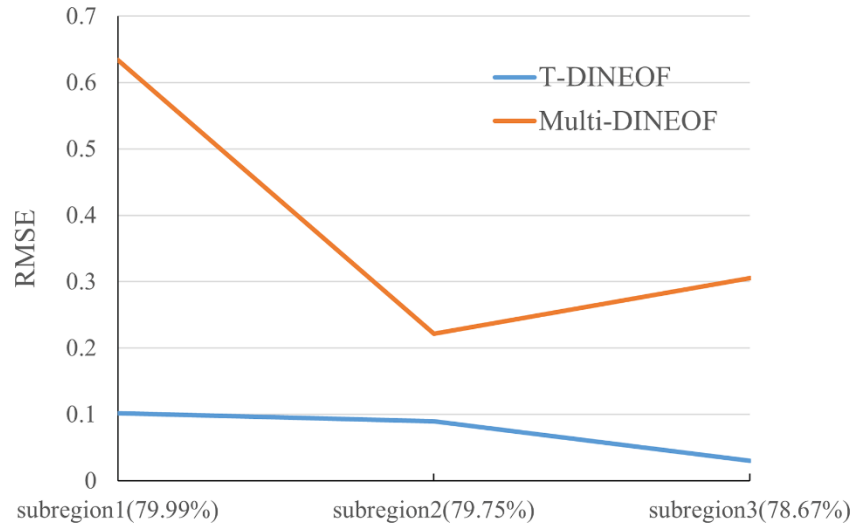

Fig. S1 RMSEs in the three subregions based on the daily datasets (Jan-Mar 2022), reconstructed using the T-DINEOF and Multi-DINEOF methods. Values in parentheses indicate the overall missing-data ratio.

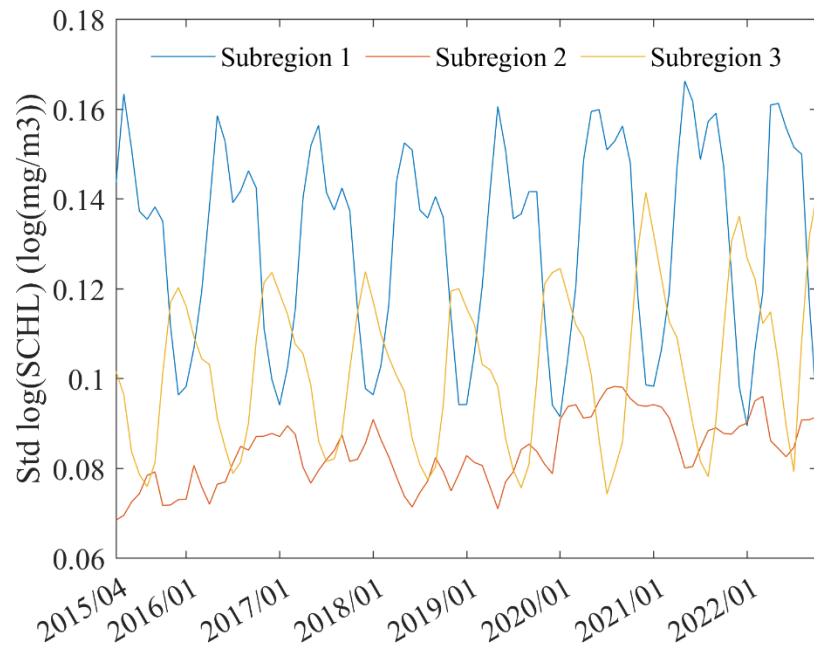

Fig. S2 Temporal standard deviation (std) of log(SCHL) in the three study regions.

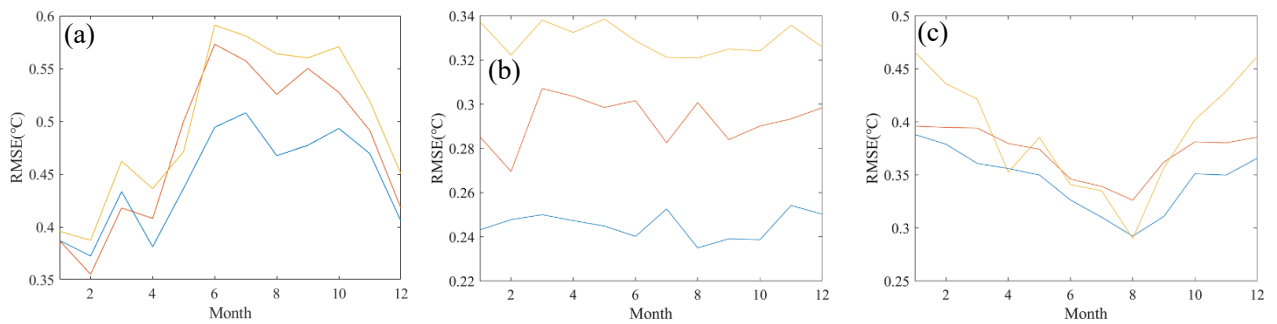

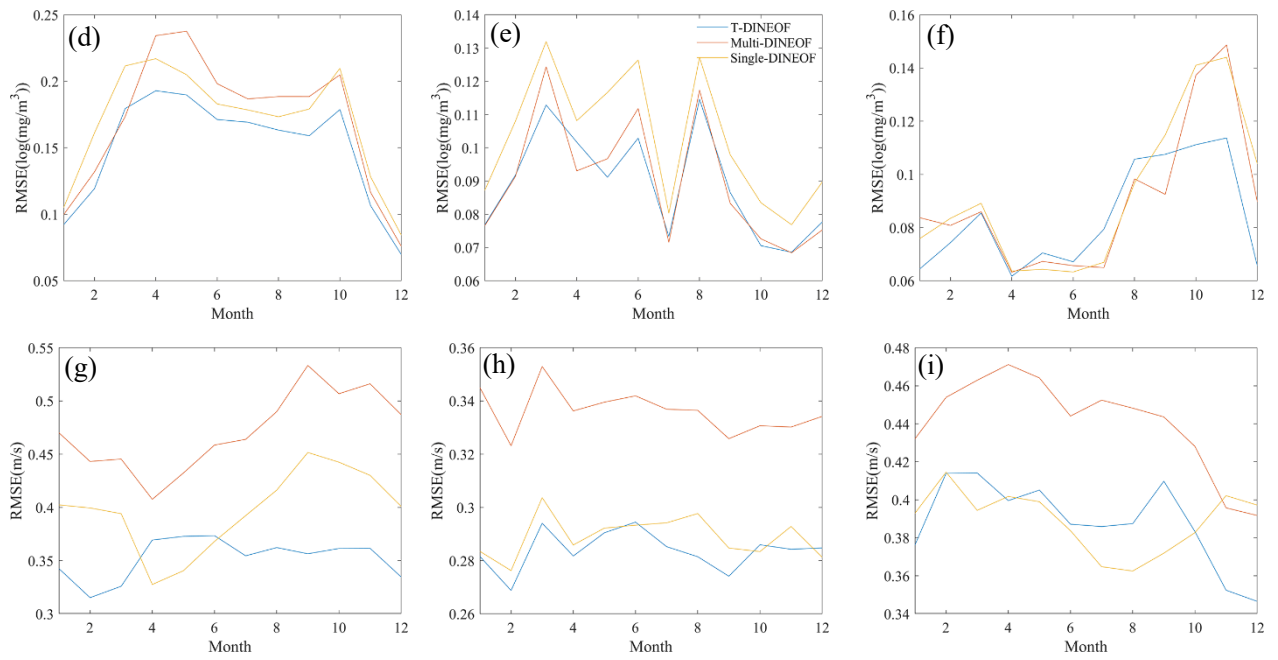

Fig. S3 Monthly RMSEs for (a-c) SST, (d-f) SCHL, and (g-i) SSW in subregions 1-3 (from left to right).

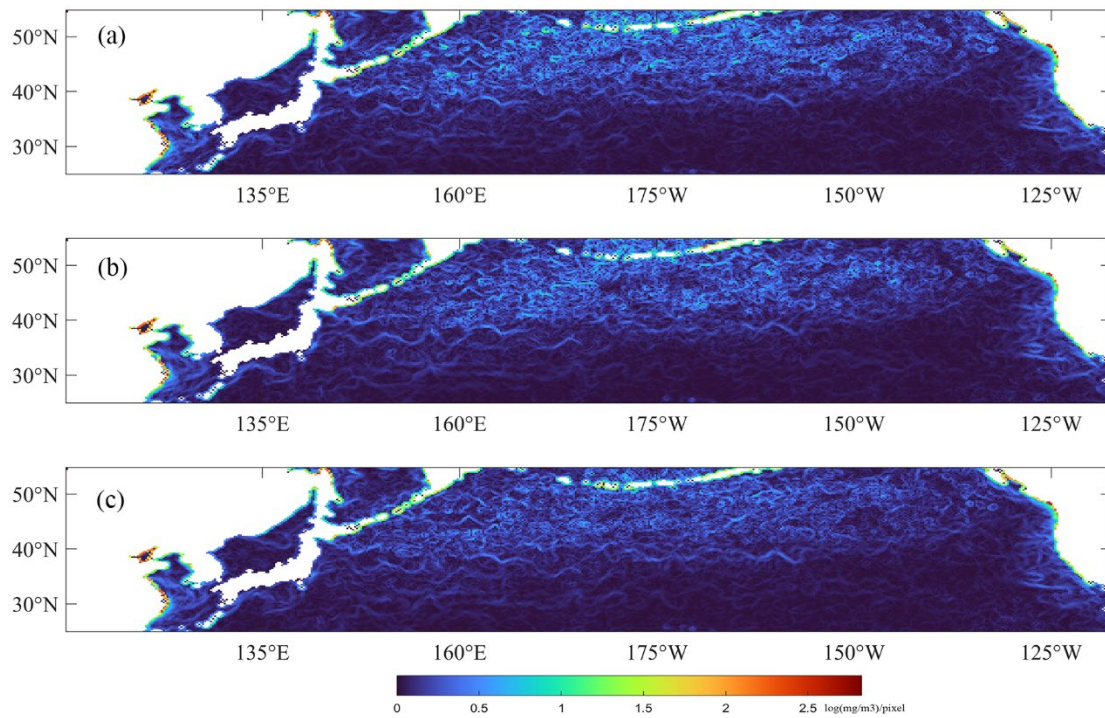

Fig. S4 Gradient maps of SCHL for July 2021 in the northern Pacific obtained from (a) Multi-DINEOF, (b) Single-DINEOF, and (c) T-DINEOF.

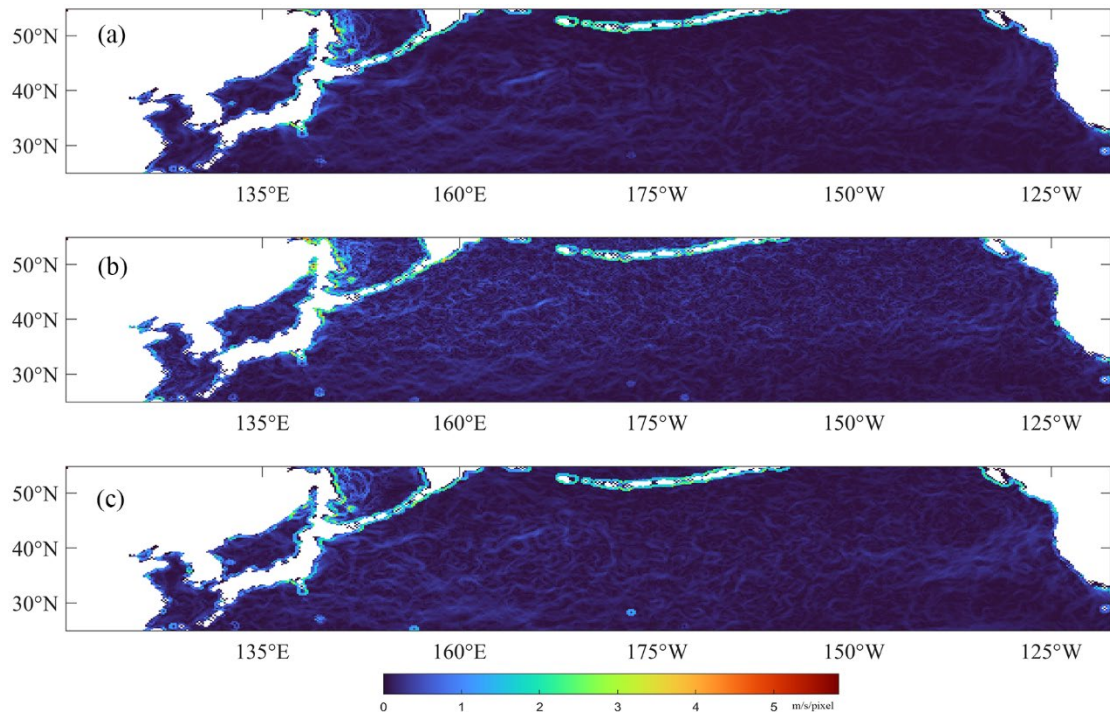

Fig. S5 Gradient maps of SSW for January 2020 in the northern Pacific obtained from (a) Multi-DINEOF, (b) Single-DINEOF, and (c) T-DINEOF.
